# Supplementary material for: Rapid prototyping of electrochemical lateral flow devices: stencilled electrodes
Source: Royal Society of Chemistry journal article supplement (doi:10.1039/c5an02424b), 2016-01-01
Supplement: c5an02424b1.pdf [file c5an02424b1.pdf]

## SUPPORTING INFORMATION

### Rapid Prototyping of Screen-Printed Electrodes: Developing Electrochemical Detectors for Lateral Flow Applications.

Miguel Aller Pellitero<sup>a</sup>, Maria Kitsara<sup>a</sup>, Friedrich Eibensteiner<sup>b</sup>, F. Javier del Campo<sup>a\*</sup>

<sup>a</sup> Institut de Microelectrònica de Barcelona, IMB-CNM (CSIC). 08193, Bellaterra, Barcelona, Spain. Tel: +34 935947700. E-mail: Javier.delcampo@csic.es

<sup>b</sup> Prelonic Technologies. Technisches Buero fuer Technische Chemie, Lannergasse 7, 4020 Linz, Austria. Tel.: +43 6647686246. E-mail: f.eibensteiner@prelonic.com

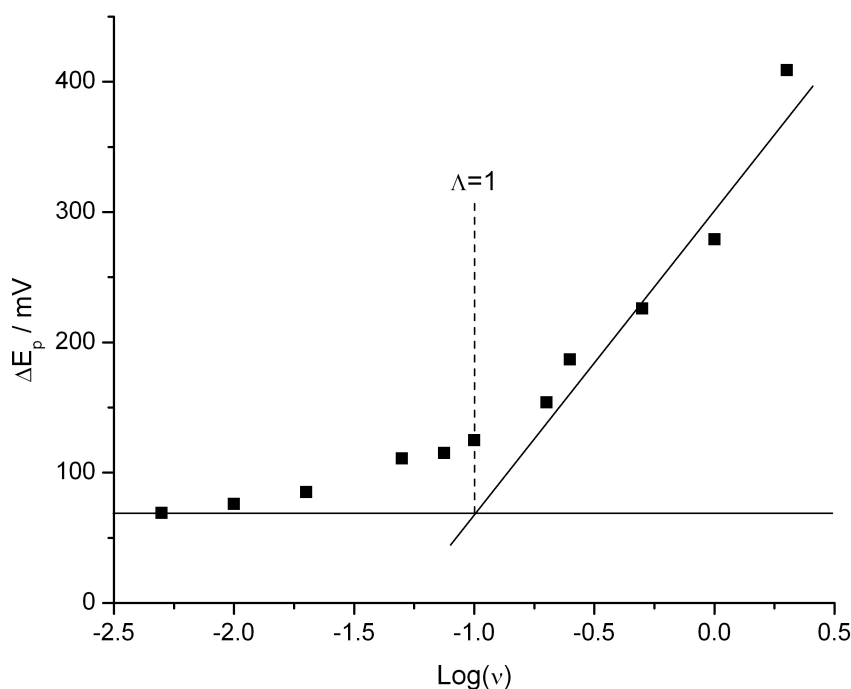

**Figure 1 S:** Variation of the peak to peak separation with the logarithm of the scan rate for a 3 mm chip in ferrocyanide 5 mM in PBS 50mM + KCl 0.1M.

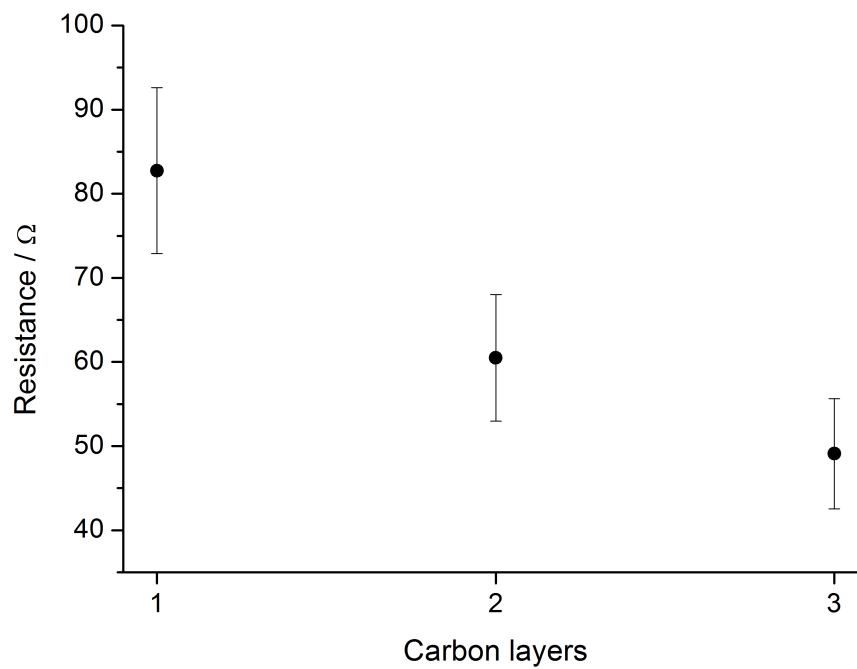

**Figure 2 S:** Resistance measured for counter working electrodes of different layers ( $n=5$ ).

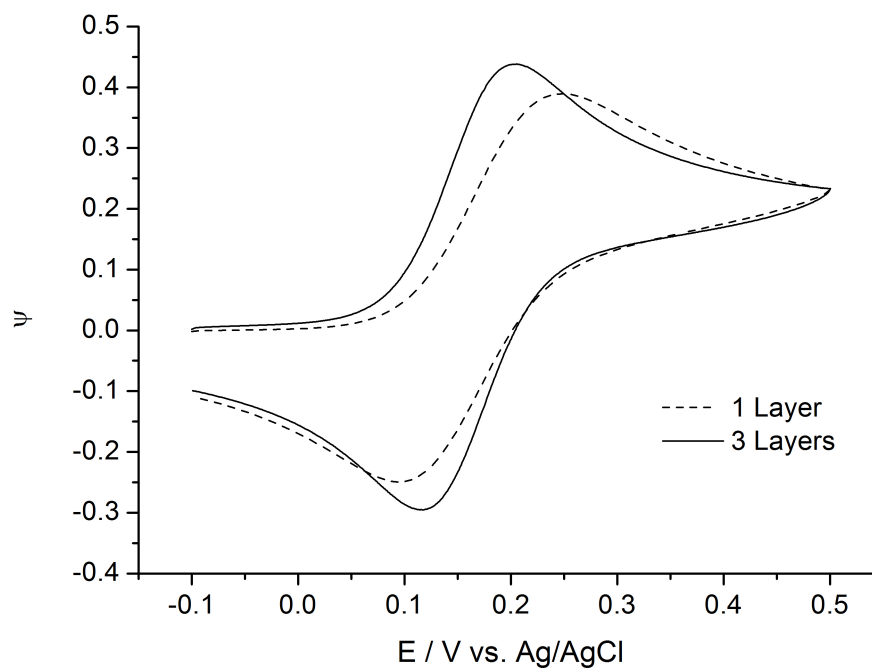

**Figure 3 S:** Comparison of one and three-layer devices cured for the same amount of time (45 min). Voltammograms obtained for ferrocyanide 5 mM in PBS 50mM + KCl 0.1M. Scan rate of 20 mVs<sup>-1</sup>.

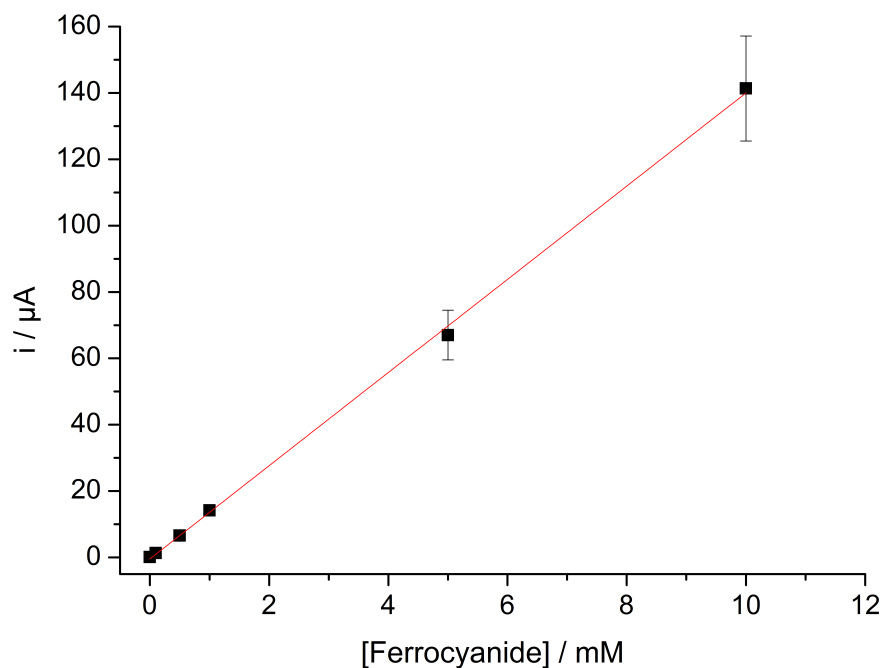

**Figure 4 S:** Variation of current intensity with ferrocyanide concentration at a fixed potential of 0.4 V vs. Ag/AgCl pseudo-reference electrode. Ferrocyanide concentrations of 0.1, 0.5, 1.0, 5.0 and 10 mM.

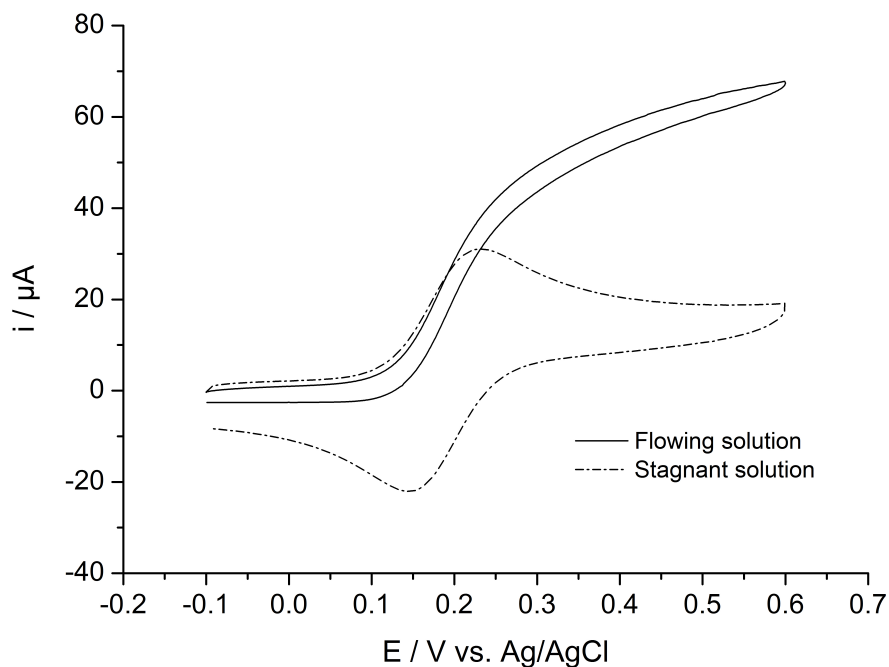

**Figure 5 S:** Cyclic voltammograms obtained for ferrocyanide 5 mM in supporting electrolyte in a stagnant solution or in fully-wetted mode. Scan rate of 10 mVs<sup>-1</sup>

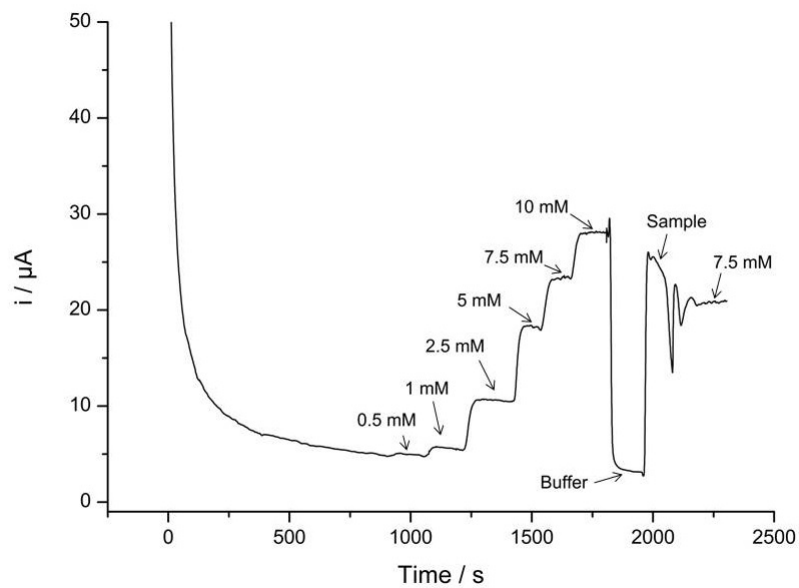

**Figure 6 S:** Chronoamperometric response of the biosensor to successive glucose additions and to a blood sample addition. Working potential of 0.2 V vs. Ag/AgCl pseudo-reference electrode.
